# Supplementary material for: Recyclable sodium titanate/graphite oxide/polyurethane polymer for efficient removal of radioactive strontium(ii) from contaminated water
Source: Royal Society of Chemistry journal article supplement (doi:10.1039/d4nj04675g), 2025-01-01
Supplement: d4nj04675g1.pdf [file d4nj04675g1.pdf]

## Supporting Information

### Recyclable Sodium Titanate/ Graphite Oxide/ Polyurethane Polymer for Efficient Removal of Radioactive Strontium(II) from Contaminated Water

Yan Zhao <sup>a</sup>, Yijun Wang <sup>a</sup>, Xinyan Zhang<sup>a,\*</sup>, Xinlu Wang <sup>a</sup>, Chuanyu Qin <sup>b, \*</sup>

<sup>a</sup> *School of Chemistry and Environmental Engineering, Changchun University of Science and Technology, Changchun, China*

<sup>b</sup> *Key Laboratory of Groundwater Resources and Environment, Ministry of Education, Jilin University, Changchun 130021, China*

e-mail: [zhangxinyan@hotmail.com](mailto:zhangxinyan@hotmail.com); [qincyu@jlu.edu.cn](mailto:qincyu@jlu.edu.cn)

#### Table of Contents

|                            |      |
|----------------------------|------|
| Supplemental Table         | S1-4 |
| Supplemental Figure        | S1   |
| Material desorption assays |      |

## Supplemental Table

**Table S1** Synthesis optimization parameters

| Reactant ratio<br>(sodium titanate: GO: NB-9000B) | Product characteristics<br>(sodium titanate/GO/PUP)                                                                         |
|---------------------------------------------------|-----------------------------------------------------------------------------------------------------------------------------|
| 1:2:100                                           | The material was 3D foam shape with low adsorption capacity.                                                                |
| 1: 1: 100                                         | Foam texture was harder and denser, and tended to sink water.                                                               |
| 2: 1: 100                                         | Good adsorption capacity, but sodium titanate particles was easy to fall off.                                               |
| <b>1 :1: 50</b>                                   | The structure remained 3D foam shape with good adsorption performance, and no obvious leakage of sodium titanate particles. |
| 1: 1: 25                                          | Loose structure with sodium titanate leakage.                                                                               |

**Table S2** Isotherm model parameters for the adsorption of strontium by sodium titanate/GO/PUP.

| Sample                 | Langmuir        |           |         | Freundlich |        |         |
|------------------------|-----------------|-----------|---------|------------|--------|---------|
|                        | $Q_{max}(mg/g)$ | $K(L/mg)$ | $R_l^2$ | $K_f(L/g)$ | $1/n$  | $R_2^2$ |
| sodium titanate/GO/PUP | 104.71          | 0.34      | 0.9991  | 68.8516    | 0.2063 | 0.94202 |

Supplementary phytotoxicity assay

**Table S3** Sample groups and their test conditions

| Group | Processing condition            |
|-------|---------------------------------|
| A     | Deionized water control         |
| B     | 200mg/L sodium titanate/GO/PUP  |
| C     | 600mg/L sodium titanate/GO/PUP  |
| D     | 1200mg/L sodium titanate/GO/PUP |

**Table S4** Indicators of wheat seeds in different sample groups

| Water samples | Germination percentage(%) | Shoot length(cm) | Fresh weight(g) | Dry weight(g) | Taotal chlorophyll (mg/L) |
|---------------|---------------------------|------------------|-----------------|---------------|---------------------------|
| A             | 85.0                      | 11.5             | 1.1             | 0.15          | 6.09                      |
| B             | 90.4(p>0.05)              | 12.5(p>0.05)     | 1.5(p>0.05)     | 0.19(p>0.05)  | 4.2(p>0.05)               |
| C             | 87.6(p>0.05)              | 12.3(p>0.05)     | 1.4(p>0.05)     | 0.19(p>0.05)  | 3.1(p>0.05)               |
| D             | 76.0(p>0.05)              | 11.7(p>0.05)     | 1.1(p>0.05)     | 0.16(p>0.05)  | 3.4(p>0.05)               |

## Supplemental Figure

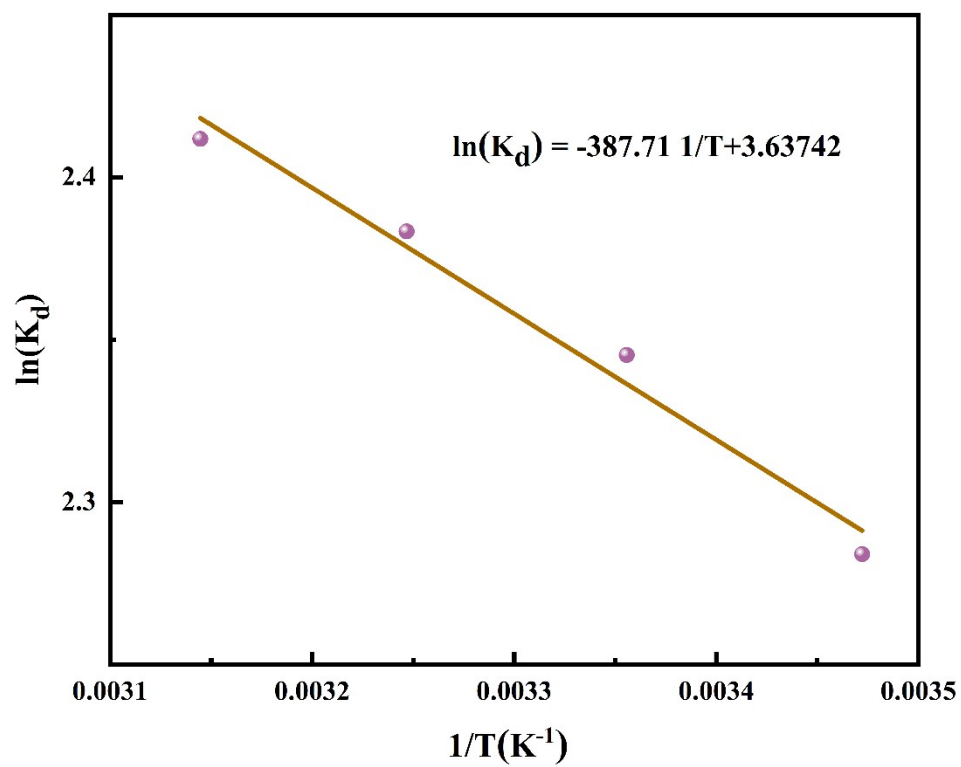

Fig. S1 Thermodynamic diagram of  $Sr^{2+}$  adsorption by sodium titanate/GO/PUP

## Material desorption assays

For safe disposal of adsorbed radioactive, it is desired that radioactive cations can be permanently trapped in the adsorbents to avoid secondary contamination. Further, the adsorbent component was not leached into the disposed water. Experiments were conducted to search the release situation of  $\text{Sr}^{2+}$  from the composite adsorbent. The separated sodium titanate/GO/PUP with adsorbed saturated amount of  $\text{Sr}^{2+}$  was rinsed with water to remove the  $\text{Sr}^{2+}$  on its surface. Then it was dispersed into certain amount of water and 0.1 M  $\text{Na}^+$  solution, respectively. The suspension was shaken on the vortex shaker for 48 h and the concentration of  $\text{Sr}^{2+}$  was determined by ICP-OES. The result revealed that there was no release of  $\text{Sr}^{2+}$  from the adsorbent to water. And about 6% of the saturated  $\text{Sr}^{2+}$  absorbed by sodium titanate/GO/PUP was released into the  $\text{Na}^+$  solution. Moreover, as well sealed by GO in the pores of PUP, no sodium titanate particles were detected leaching from loaded-PUP into solution. Obviously, the  $\text{Sr}^{2+}$  had been immobilized in sodium titanate/GO/PUP during adsorption without further treatment.
